# Supplementary material
Source: PubMed Central journal article supplement (PMC8277659)
Supplement: NIHMS1657586-supplement-2.pdf [file NIHMS1657586-supplement-2.pdf]

| <b>Table E1: Proportion of current food allergies in three food groups among Black and White children with food allergy</b> |                  |                  |                  |
|-----------------------------------------------------------------------------------------------------------------------------|------------------|------------------|------------------|
|                                                                                                                             | <b>Total</b>     | <b>White</b>     | <b>Black</b>     |
|                                                                                                                             | <b>n(%)</b>      | <b>n(%)</b>      | <b>n (%)</b>     |
| <b>Total</b>                                                                                                                | <b>664 (100)</b> | <b>425 (100)</b> | <b>239 (100)</b> |
| <b>Type of Current Food Allergy</b>                                                                                         |                  |                  |                  |
| Fin fish (>=1)                                                                                                              | 92 (13.9)        | 35 (8.2)         | 57 (23.9)        |
| Salmon                                                                                                                      | 65 (9.8)         | 25 (5.9)         | 40 (16.7)        |
| Tuna                                                                                                                        | 55 (8.3)         | 19 (4.5)         | 36 (15.1)        |
| Tilapia                                                                                                                     | 64 (9.6)         | 22 (5.2)         | 42 (17.6)        |
| Trout                                                                                                                       | 44 (6.6)         | 13 (3.1)         | 31 (12.9)        |
| Halibut                                                                                                                     | 49 (7.4)         | 16 (3.8)         | 33 (13.8)        |
| Cod                                                                                                                         | 62 (9.3)         | 21 (4.9)         | 41 (17.2)        |
| Catfish                                                                                                                     | 54 (8.1)         | 12 (2.8)         | 42 (17.6)        |
| Swordfish                                                                                                                   | 44 (6.6)         | 13 (3.1)         | 31 (12.9)        |
| Grouper                                                                                                                     | 43 (6.5)         | 12 (2.8)         | 31 (12.9)        |
| Shellfish (>=1)                                                                                                             | 110 (16.6)       | 34 (8.0)         | 76 (31.8)        |
| Shrimp                                                                                                                      | 98 (14.8)        | 29 (6.8)         | 69 (28.9)        |
| Lobster                                                                                                                     | 77 (11.6)        | 22 (5.2)         | 55 (23.0)        |
| Crab                                                                                                                        | 79 (11.9)        | 23 (5.4)         | 56 (23.4)        |
| Crayfish                                                                                                                    | 63 (9.5)         | 13 (3.1)         | 50 (20.9)        |
| Scallop                                                                                                                     | 67 (10.1)        | 15 (3.5)         | 52 (21.8)        |
| Oyster                                                                                                                      | 62 (9.3)         | 15 (3.5)         | 47 (19.7)        |
| Clam                                                                                                                        | 61 (9.2)         | 15 (3.5)         | 46 (19.3)        |
| Mussel                                                                                                                      | 59 (8.9)         | 14 (3.3)         | 45 (18.8)        |
| Tree nuts (>=1)                                                                                                             | 353 (53.2)       | 218 (51.3)       | 135 (56.5)       |
| Almond                                                                                                                      | 210 (31.6)       | 121(28.5)        | 89 (37.2)        |
| Hazelnut                                                                                                                    | 216 (32.5)       | 130 (30.6)       | 86 (35.9)        |
| Cashew                                                                                                                      | 290 (43.7)       | 179 (42.1)       | 111 (46.4)       |
| Brazil                                                                                                                      | 187 (28.2)       | 106 (24.9)       | 81 (33.9)        |
| Macadamia                                                                                                                   | 184 (27.7)       | 107 (25.2)       | 77 (32.2)        |
| Pistachio                                                                                                                   | 249 (37.5)       | 159 (37.4)       | 90 (37.7)        |
| Pecan                                                                                                                       | 222 (33.4)       | 131 (30.8)       | 91 (38.1)        |
| Walnut                                                                                                                      | 244 (36.8)       | 143 (33.7)       | 101 (42.3)       |

There were significant racial differences in the unadjusted analyses for all finfish (ie, salmon,

---

tuna, tilapia, trout, halibut, cod,catfish,swordfish and Grouper), all shellfish (ie, shrimp, lobster, crab, crayfish, scallop, oyster, clam, mussel) and three tree nuts (almond, brazil nuts, walnut). Due to the small numbers in each group an adjusted analysis was no done.

Journal Pre-proof
